# Supplementary material
Source: PubMed Central journal article supplement (PMC3036769)
Supplement: NIHMS245759-supplement-SI_Table_1.pdf [file NIHMS245759-supplement-SI_Table_1.pdf]

**SI Table 2.** Heavy atoms assigned to the chemical groups of the amino acid side-chains.

| AA  | Chemical groups       |                       |                    |                  |                                      |              |                  |                        |
|-----|-----------------------|-----------------------|--------------------|------------------|--------------------------------------|--------------|------------------|------------------------|
|     | <i>Aromatic rings</i> | <i>Hydroxyl group</i> | <i>Thiol group</i> | <i>Carboxyl</i>  | <i>Aliphatic carbons</i>             | <i>Amine</i> | <i>Amide</i>     | <i>Guanidine</i>       |
| CYS |                       |                       | SG                 |                  |                                      |              |                  |                        |
| ASP |                       |                       |                    | CG<br>OD1<br>OD2 |                                      |              |                  |                        |
| GLU |                       |                       |                    | CD<br>OE1<br>OE2 |                                      |              |                  |                        |
| PHE |                       |                       |                    |                  | CG<br>CD1<br>CD2<br>CE1<br>CE2<br>CZ |              |                  |                        |
| HIS |                       |                       |                    |                  | CG<br>CD2<br>NE2<br>CE1<br>ND1       |              |                  |                        |
| ILE |                       |                       |                    |                  | CD1<br>CG1<br>CG2                    |              |                  |                        |
| LYS |                       |                       |                    |                  |                                      | NZ           |                  |                        |
| LEU |                       |                       |                    |                  | CD1<br>CD2<br>CG                     |              |                  |                        |
| MET |                       |                       | SD<br>CE           |                  |                                      |              |                  |                        |
| ASN |                       |                       |                    |                  |                                      |              | CG<br>OD1<br>ND2 |                        |
| GLN |                       |                       |                    |                  |                                      |              | CD<br>OE1<br>NE2 |                        |
| ARG |                       |                       |                    |                  |                                      |              |                  | CZ<br>NE<br>NH1<br>NH2 |
| SER |                       | OG                    |                    |                  |                                      |              |                  |                        |

|     |                                                                                                                      |            |
|-----|----------------------------------------------------------------------------------------------------------------------|------------|
| THR |                                                                                                                      | OG1        |
| VAL |                                                                                                                      | CG1<br>CG2 |
| TRP | CG (1)<br>CD1 (1)<br>NE1 (1)<br>CE2 (1)<br>CD2 (1)<br>CE2 (2)<br>CD2 (2)<br>CE3 (2)<br>CZ3 (2)<br>CH2 (2)<br>CZ2 (2) |            |
| TYR | CG<br>CD1<br>CD2<br>CE1<br>CE2<br>CZ                                                                                 | OH         |
